# Supplementary material
Source: publisher figshare collection journal article supplement (https://acs.figshare.com/ndownloader/files/4555924)
Supplement: Supplementary file 1 [file 4555924]

# Supporting Information -

## Multifunctional polymer coatings for cell microarray applications

*Mahaveer D. Kurkuri<sup>a</sup>, Chantelle Driever<sup>b</sup>, Graham Johnson<sup>c</sup>, Gail McFarland<sup>c</sup>,*

*Helmut Thissen<sup>\*b,d</sup>, Nicolas H. Voelcker<sup>\*a,d</sup>*

<sup>a</sup> School of Chemistry, Physics and Earth Sciences, Flinders University, GPO Box 2100, Bedford Park  
SA 5042, Australia

<sup>b</sup> CSIRO Molecular and Health Technologies, Bayview Avenue, Clayton VIC 3168, Australia

<sup>c</sup> CSIRO Molecular and Health Technologies, Riverside Corporate Park, 11 Julius Avenue, North Ryde  
NSW 2113, Australia

<sup>d</sup> CSIRO Food Futures Flagship, Riverside Corporate Park, 5 Julius Avenue, North Ryde NSW 2113,  
Australia

Table S1: XPS elemental compositions (atomic concentration in %) obtained from survey spectra for the coatings used in this study. In addition elemental ratios calculated from these results are shown.

| <b>Sample</b>      | <b>%C</b> | <b>%O</b> | <b>%N</b> | <b>O/C</b> | <b>N/C</b> |
|--------------------|-----------|-----------|-----------|------------|------------|
| <b>Glass-ALAPP</b> | 79.0      | 8.6       | 12.4      | 0.109      | 0.157      |
| <b>DC1:1</b>       | 66.4      | 33.6      | 0.0       | 0.506      | 0.000      |
| <b>G1:1</b>        | 67.5      | 32.2      | 0.3       | 0.477      | 0.004      |
| <b>SC1:1</b>       | 69.0      | 31.0      | 0.0       | 0.449      | 0.000      |

Table S2: Quantification of components C1-C4 fitted to XPS C1s high resolution spectra as seen in Figure 3. Shown here are the ratios of the individual components of the overall carbon detected on these surfaces.

| Sample      | C1/C  | C2/C  | C3/C  | C4/C  |
|-------------|-------|-------|-------|-------|
| Glass-ALAPP | 0.688 | 0.225 | 0.062 | 0.025 |
| DC1:1       | 0.314 | 0.574 | 0.000 | 0.112 |
| G1:1        | 0.248 | 0.647 | 0.003 | 0.102 |
| SC1:1       | 0.206 | 0.722 | 0.003 | 0.069 |

Table S3: HeLa cell attachment after 24 h to various factors printed at concentration ranging from 12.5 to 200  $\mu\text{g/ml}$  relative to the attachment to Coll-I printed at a concentration of 100  $\mu\text{g/ml}$  in percent. Here the mean ( $\pm$  *sd*) fluorescence signal intensity data obtained on printed spots are compared to the intensity data obtained from Coll-I at 100  $\mu\text{g/ml}$  and expressed as a percentage cell attachment.

| Conc.<br>( $\mu\text{g/ml}$ ) | Col IV               | PAA                 | Col I                        | LMN                  | FBR                  | PEI                  | BSA                | PNA                | CONA                | WGA                | DBA                 | PAMAM                |
|-------------------------------|----------------------|---------------------|------------------------------|----------------------|----------------------|----------------------|--------------------|--------------------|---------------------|--------------------|---------------------|----------------------|
| <b>12.5</b>                   | 2.58<br>$\pm 1.49$   | 3.04<br>$\pm 0.91$  | 26.91<br>$\pm 2.87$          | 2.62<br>$\pm 1.83$   | 2.53<br>$\pm 1.74$   | 1.92<br>$\pm 2.47$   | 1.06<br>$\pm 2.10$ | 0.16<br>$\pm 0.29$ | 0.12<br>$\pm 0.29$  | 0.02<br>$\pm 0.04$ | 0.05<br>$\pm 0.11$  | 0.10<br>$\pm 0.18$   |
| <b>25.0</b>                   | 6.85<br>$\pm 1.39$   | 3.35<br>$\pm 1.44$  | 57.52<br>$\pm 10.66$         | 3.70<br>$\pm 1.14$   | 7.15<br>$\pm 2.62$   | 34.39<br>$\pm 22.23$ | 0.27<br>$\pm 0.41$ | 0.73<br>$\pm 0.59$ | 0.38<br>$\pm 0.35$  | 0.15<br>$\pm 0.25$ | 0.43<br>$\pm 0.42$  | 0.15<br>$\pm 0.34$   |
| <b>50.0</b>                   | 22.94<br>$\pm 5.35$  | 10.20<br>$\pm 2.46$ | 85.41<br>$\pm 11.22$         | 16.19<br>$\pm 4.12$  | 29.12<br>$\pm 12.51$ | 63.87<br>$\pm 3.32$  | 0.52<br>$\pm 0.46$ | 0.90<br>$\pm 0.63$ | 0.61<br>$\pm 0.86$  | 0.65<br>$\pm 1.33$ | 2.56<br>$\pm 2.39$  | 0.14<br>$\pm 0.11$   |
| <b>100.0</b>                  | 50.57<br>$\pm 7.98$  | 7.24<br>$\pm 2.81$  | <b>100.00</b><br>$\pm 14.69$ | 41.97<br>$\pm 12.33$ | 76.62<br>$\pm 18.95$ | 86.96<br>$\pm 22.35$ | 7.00<br>$\pm 1.24$ | 7.69<br>$\pm 1.35$ | 10.96<br>$\pm 1.84$ | 4.95<br>$\pm 1.28$ | 13.11<br>$\pm 2.68$ | 33.11<br>$\pm 13.75$ |
| <b>150.0</b>                  | 84.46<br>$\pm 6.86$  | 21.22<br>$\pm 3.37$ | 95.25<br>$\pm 16.30$         | 42.88<br>$\pm 5.17$  | 81.10<br>$\pm 26.15$ | 74.92<br>$\pm 11.14$ | 4.46<br>$\pm 3.19$ | 8.22<br>$\pm 7.85$ | 32.89<br>$\pm 7.93$ | 1.94<br>$\pm 2.38$ | 33.86<br>$\pm 2.26$ | 83.72<br>$\pm 14.28$ |
| <b>200.0</b>                  | 83.98<br>$\pm 11.79$ | 33.12<br>$\pm 7.10$ | 99.01<br>$\pm 13.15$         | 66.86<br>$\pm 9.47$  | 88.75<br>$\pm 16.85$ | 70.03<br>$\pm 5.78$  | 4.57<br>$\pm 0.94$ | 8.89<br>$\pm 2.48$ | 32.07<br>$\pm 4.74$ | 7.85<br>$\pm 4.69$ | 7.87<br>$\pm 3.01$  | 92.83<br>$\pm 9.27$  |
